# Supplementary material
Source: HighWire-hosted journal article supplement (http://www.qdcxjkg.com/highwire/filestream/113759/field_highwire_adjunct_files/0/ERJ-01805-2012_Disclosures.pdf)
Supplement: ERJ-01805-2012_Disclosures.pdf [file ERJ-01805-2012_Disclosures.pdf]

L. Bertolotti has relationships with drug companies including Actelion, Alliance BMS-Pfizer, Bayer, Boehringer Ingelheim, GSK, Portola, Sanofi-Aventis. In addition to being an investigator in trials involving these companies, relationships include consultancy service and membership of scientific advisory boards.

D. Montani has relationships with drug companies including AB Science, Actelion, BayerSchering, GSK, Novartis, Pfizer and United Therapeutics. In addition to being an investigator in trials involving these companies, relationships include consultancy service and membership of scientific advisory boards.
